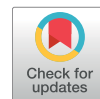

# Erratum

**Erratum. Spike in Diabetic Ketoacidosis Rates in Pediatric Type 2 Diabetes During the COVID-19 Pandemic. Diabetes Care 2021;44:1451–1453**

*Lily C. Chao, Alaina P. Vidmar, and  
Senta Georgia*

<https://doi.org/10.2337/dc21-er12>

In the article cited above, the first sentence of the Research Design and Methods section included the information “(within the previous 90 days).” The authors have clarified this text to read “between 1 March and 31 August of 2018, 2019, and 2021.”

The authors apologize for the oversight.

The online version of the article (<https://doi.org/10.2337/dc20-2733>) has been updated with the corrected text.
